# Supplementary material for: Strategy for the creation of clinical grade hESC line banks that HLA-match a target population
Source: PubMed Central journal article supplement (PMC3569650; doi:10.1002/emmm.201201973), 2012-11-19
Supplement: emmm0005-0010-SD2.pdf [file emmm0005-0010-SD2.pdf]

# Strategy for creation of clinical grade hESC line banks that HLA-match target population

Laureen Jacquet<sup>1†</sup>, Emma Stephenson<sup>1†</sup>, Robert Collins<sup>2†</sup>, Heema Patel<sup>3</sup>, Jane Trussler<sup>3</sup>,  
Roaa Al-Bedaery<sup>1</sup>, Pamela Renwick<sup>3</sup>, Caroline Ogilvie<sup>3</sup>, Robert Vaughan<sup>2,4</sup> & Dusko Ilic<sup>1\*</sup>

<sup>1</sup>Embryonic Stem Cell Laboratories, Guy's Assisted Conception Unit, Division of Women's Health, King's College School of Medicine, London, UK; <sup>2</sup>Clinical Transplantation Laboratory, GSTS Pathology, Guy's Hospital, London, UK; <sup>3</sup>Guy's & St. Thomas' Centre for Preimplantation Genetic Diagnosis and Genetics Centre, Guy's & St. Thomas' NHS Foundation Trust, London, UK; <sup>4</sup>MRC Centre for Transplantation, King's College London, King's Heath Partners.

† These authors contributed equally to the work.

SUPPORTING INFORMATION TABLE OF CONTENTS:

## Supplementary Figures

Supplementary Figure 1 S2

Supplementary Figure 2 S3

## Supplementary Tables

Supplementary Table 1 S4

Supplementary Table 2 S5 - S11

**Figure S1. Characterization of our clinical grade hESC lines including fingerprinting, karyotype, pluripotency and differentiation potential. NYD, not yet done.**

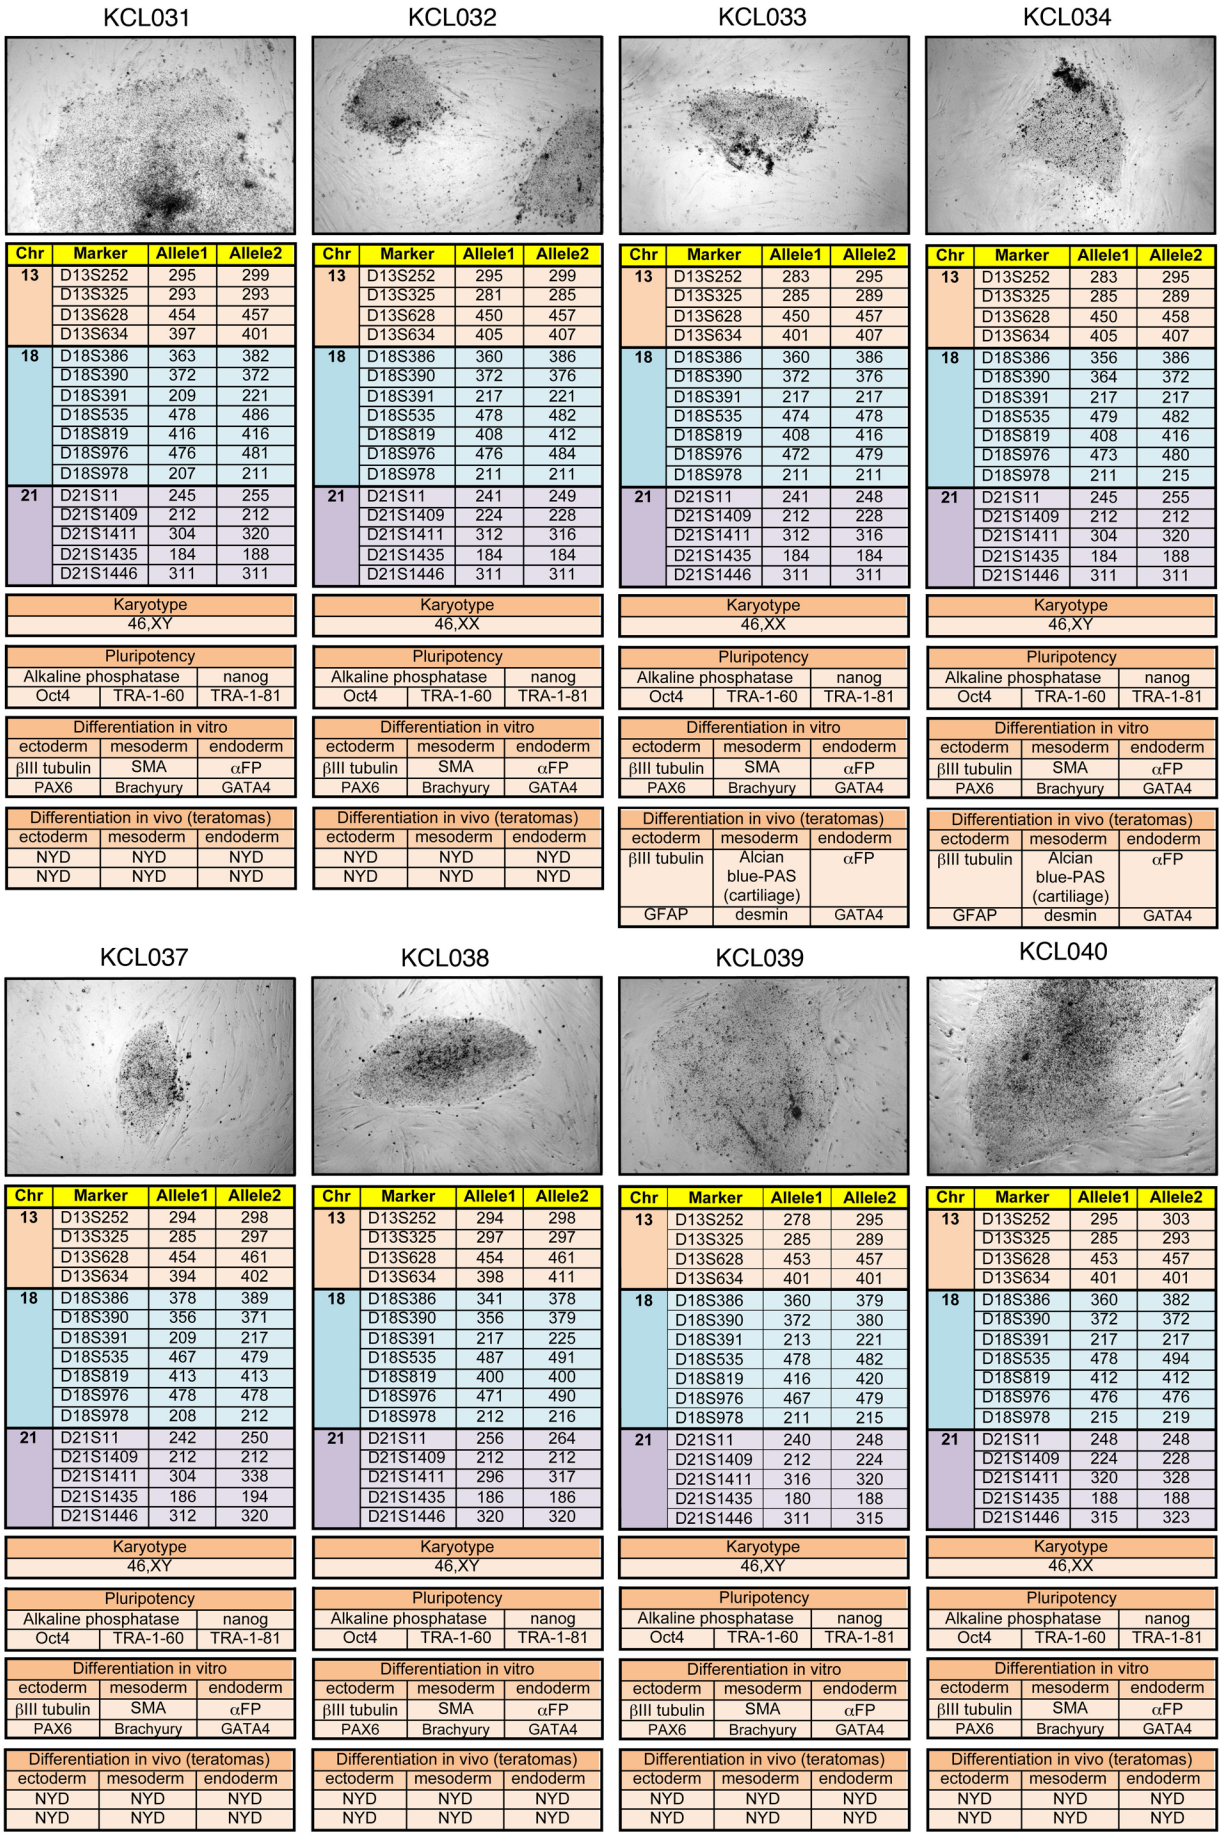

**Figure S2. Characterization of our HD hESC lines including fingerprinting, karyotype, pluripotency and differentiation potential. NYD, not yet done.**

| KCL012                                                                                                      |          |         |         | KCL013                                                                                                      |          |         |         |
|-------------------------------------------------------------------------------------------------------------|----------|---------|---------|-------------------------------------------------------------------------------------------------------------|----------|---------|---------|
| 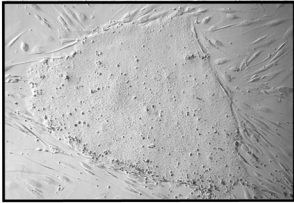                           |          |         |         |                            |          |         |         |
| Chr                                                                                                         | Marker   | Allele1 | Allele2 | Chr                                                                                                         | Marker   | Allele1 | Allele2 |
| 13                                                                                                          | D13S252  | 278     | 290     | 13                                                                                                          | D13S252  | 278     | 299     |
|                                                                                                             | D13S325  | 292     | 301     |                                                                                                             | D13S325  | 297     | 301     |
|                                                                                                             | D13S628  | 446     | 457     |                                                                                                             | D13S628  | 446     | 457     |
|                                                                                                             | D13S634  | 398     | 405     |                                                                                                             | D13S634  | 397     | 405     |
| 18                                                                                                          | D18S386  | 367     | 383     | 18                                                                                                          | D18S386  | 356     | 356     |
|                                                                                                             | D18S390  | 360     | 372     |                                                                                                             | D18S390  | 364     | 368     |
|                                                                                                             | D18S391  | 217     | 217     |                                                                                                             | D18S391  | 217     | 217     |
|                                                                                                             | D18S535  | 478     | 478     |                                                                                                             | D18S535  | 478     | 499     |
|                                                                                                             | D18S819  | 416     | 416     |                                                                                                             | D18S819  | 412     | 420     |
|                                                                                                             | D18S976  | 480     | 483     |                                                                                                             | D18S976  | 480     | 483     |
|                                                                                                             | D18S978  | 211     | 219     |                                                                                                             | D18S978  | 211     | 211     |
| 21                                                                                                          | D21S11   | 244     | 252     | 21                                                                                                          | D21S11   | 241     | 241     |
|                                                                                                             | D21S1409 | 212     | 224     |                                                                                                             | D21S1409 | 212     | 220     |
|                                                                                                             | D21S1411 | 323     | 323     |                                                                                                             | D21S1411 | 324     | 324     |
|                                                                                                             | D21S1435 | 184     | 188     |                                                                                                             | D21S1435 | 184     | 188     |
|                                                                                                             | D21S1446 | 331     | 331     |                                                                                                             | D21S1446 | 319     | 339     |
| Karyotype<br>46,XY                                                                                          |          |         |         | Karyotype<br>46,XY                                                                                          |          |         |         |
| Pluripotency<br>Alkaline phosphatase   nanog<br>Oct4   TRA-1-60   TRA-1-81                                  |          |         |         | Pluripotency<br>Alkaline phosphatase   nanog<br>Oct4   TRA-1-60   TRA-1-81                                  |          |         |         |
| Differentiation in vitro<br>ectoderm   mesoderm   endoderm<br>βIII tubulin   SMA   αFP                      |          |         |         | Differentiation in vitro<br>ectoderm   mesoderm   endoderm<br>βIII tubulin   SMA   αFP                      |          |         |         |
| Differentiation in vivo (teratomas)<br>ectoderm   mesoderm   endoderm<br>NYD   NYD   NYD<br>NYD   NYD   NYD |          |         |         | Differentiation in vivo (teratomas)<br>ectoderm   mesoderm   endoderm<br>NYD   NYD   NYD<br>NYD   NYD   NYD |          |         |         |

| KCL027                                                                                                                                             |          |         |         | KCL028                                                                                                                                             |          |         |         | KCL036                                                                                                             |          |         |         |
|----------------------------------------------------------------------------------------------------------------------------------------------------|----------|---------|---------|----------------------------------------------------------------------------------------------------------------------------------------------------|----------|---------|---------|--------------------------------------------------------------------------------------------------------------------|----------|---------|---------|
| 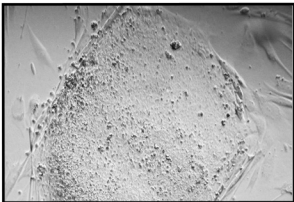                                                                |          |         |         |                                                                 |          |         |         |                                |          |         |         |
| Chr                                                                                                                                                | Marker   | Allele1 | Allele2 | Chr                                                                                                                                                | Marker   | Allele1 | Allele2 | Chr                                                                                                                | Marker   | Allele1 | Allele2 |
| 13                                                                                                                                                 | D13S252  | 299     | 303     | 13                                                                                                                                                 | D13S252  | 299     | 303     | 13                                                                                                                 | D13S252  | 278     | 299     |
|                                                                                                                                                    | D13S325  | 289     | 293     |                                                                                                                                                    | D13S325  | 289     | 293     |                                                                                                                    | D13S325  | 293     | 301     |
|                                                                                                                                                    | D13S628  | 450     | 457     |                                                                                                                                                    | D13S628  | 450     | 458     |                                                                                                                    | D13S628  | 453     | 453     |
|                                                                                                                                                    | D13S634  | 394     | 405     |                                                                                                                                                    | D13S634  | 394     | 405     |                                                                                                                    | D13S634  | 397     | 401     |
| 18                                                                                                                                                 | D18S386  | 356     | 386     | 18                                                                                                                                                 | D18S386  | 356     | 386     | 18                                                                                                                 | D18S386  | 379     | 382     |
|                                                                                                                                                    | D18S390  | 372     | 372     |                                                                                                                                                    | D18S390  | 372     | 372     |                                                                                                                    | D18S390  | 368     | 372     |
|                                                                                                                                                    | D18S391  | 217     | 217     |                                                                                                                                                    | D18S391  | 217     | 217     |                                                                                                                    | D18S391  | 209     | 217     |
|                                                                                                                                                    | D18S535  | 486     | 486     |                                                                                                                                                    | D18S535  | 486     | 486     |                                                                                                                    | D18S535  | 478     | 482     |
|                                                                                                                                                    | D18S819  | 412     | 420     |                                                                                                                                                    | D18S819  | 412     | 420     |                                                                                                                    | D18S819  | 400     | 408     |
|                                                                                                                                                    | D18S976  | 473     | 483     |                                                                                                                                                    | D18S976  | 473     | 483     |                                                                                                                    | D18S976  | 476     | 483     |
|                                                                                                                                                    | D18S978  | 211     | 211     |                                                                                                                                                    | D18S978  | 211     | 211     |                                                                                                                    | D18S978  | 211     | 211     |
| 21                                                                                                                                                 | D21S11   | 245     | 245     | 21                                                                                                                                                 | D21S11   | 244     | 244     | 21                                                                                                                 | D21S11   | 249     | 259     |
|                                                                                                                                                    | D21S1409 | 212     | 220     |                                                                                                                                                    | D21S1409 | 212     | 220     |                                                                                                                    | D21S1409 | 216     | 224     |
|                                                                                                                                                    | D21S1411 | 312     | 324     |                                                                                                                                                    | D21S1411 | 312     | 324     |                                                                                                                    | D21S1411 | 312     | 316     |
|                                                                                                                                                    | D21S1435 | 193     | 193     |                                                                                                                                                    | D21S1435 | 192     | 192     |                                                                                                                    | D21S1435 | 188     | 188     |
|                                                                                                                                                    | D21S1446 | 311     | 315     |                                                                                                                                                    | D21S1446 | 311     | 315     |                                                                                                                    | D21S1446 | 311     | 325     |
| Karyotype<br>46,XY                                                                                                                                 |          |         |         | Karyotype<br>46,XY                                                                                                                                 |          |         |         | Karyotype<br>46,XX                                                                                                 |          |         |         |
| Pluripotency<br>Alkaline phosphatase   nanog<br>Oct4   TRA-1-60   TRA-1-81                                                                         |          |         |         | Pluripotency<br>Alkaline phosphatase   nanog<br>Oct4   TRA-1-60   TRA-1-81                                                                         |          |         |         | Pluripotency<br>Alkaline phosphatase   nanog<br>Oct4   TRA-1-60   TRA-1-81                                         |          |         |         |
| Differentiation in vitro<br>ectoderm   mesoderm   endoderm<br>βIII tubulin   SMA   αFP<br>PAX6   Brachyury   GATA4                                 |          |         |         | Differentiation in vitro<br>ectoderm   mesoderm   endoderm<br>βIII tubulin   SMA   αFP<br>PAX6   Brachyury   GATA4                                 |          |         |         | Differentiation in vitro<br>ectoderm   mesoderm   endoderm<br>βIII tubulin   SMA   αFP<br>PAX6   Brachyury   GATA4 |          |         |         |
| Differentiation in vivo (teratomas)<br>ectoderm   mesoderm   endoderm<br>βIII tubulin   Alcian blue-PAS (cartilage)   αFP<br>GFAP   desmin   GATA4 |          |         |         | Differentiation in vivo (teratomas)<br>ectoderm   mesoderm   endoderm<br>βIII tubulin   Alcian blue-PAS (cartilage)   αFP<br>GFAP   desmin   GATA4 |          |         |         | Differentiation in vivo (teratomas)<br>ectoderm   mesoderm   endoderm<br>NYD   NYD   NYD<br>NYD   NYD   NYD        |          |         |         |

### Supplementary Table 1. HLA haplotypes for our clinical grade lines.

Medium resolution haplotyping was selected as an equivalent to that used for solid organ donation with the addition of immunosuppression.

| hESC line | HLA-A* | HLA-B*         | HLA-Bw | HLA-C*          | HLA-DRB1*         | HLA-DRB3/4/5* | HLA-DQB1*            |
|-----------|--------|----------------|--------|-----------------|-------------------|---------------|----------------------|
| KCL031    | 02     | 51             | 4      | 14:01/07N/11/14 | 11                | 3*02          | 03:01/19/21/22/24    |
|           | 24     | 52:01/04/07/13 |        | 12:02/17/22/30  | 15                | 5*01          | 06:01                |
| KCL032    | 02     | 15             | 6      | 03              | 04:07             | 4*01          | 03:01/19/21/22/24    |
|           | 11     | 51             | 4      | 04              | 13:02/39/73/96    | 3*03          | 06:04/27/34/36/38/39 |
| KCL033    | 11     | 44             | 4      | 16              | 04:07             | 4*01          | 03:01/19/21/22/24    |
|           | 29     | 51             |        | 04              | 07                |               | 02:02                |
| KCL034    | 11     | 44             | 4      | 16              | 04:07             | 4*01          | 03:01/19/21/22/24    |
|           | 29     | 51             |        | 04              | 07                |               | 02:02                |
| KCL037    | 02     | 35             | 6      | 03              | 01                | 3*03          | 05:01                |
|           | 03     | 40             |        | 04              | 13:02/39/73/96    |               | 06                   |
| KCL038    | 03     | 07             | 6      | 03              | 14                | 3*02          | 05:03                |
|           | 11     | 15             |        | 07              | 15                | 5*01          | 06:02/11/16/33       |
| KCL039    | 01     | 35:02/83       | 4      | 04              | 3                 | 3*01/02       | 02:01/04/05          |
|           | 24     | 49:01/06/08    |        | 07              |                   |               |                      |
| KCL040    | 03     | 07             | 6      | 03              | 04:04/23/42/56/70 | 4*01, 5*01    | 03:02                |
|           | 24     | 15             |        | 07              | 15                |               | 06:02/11/14/26N      |

**Supplementary Table 2. Self-declared ethnicity of all patients attending Guy's ACU for treatment in 2010.**

Each couple completes a standard registration form at the beginning of treatment, in which they declare their ethnicity in an open format. Results are presented exactly as written without amalgamation.

**Ethnicities of all PGD patients**

(from 165 PGD patients, 158 females and 156 males stated their ethnicity)

| <b>Ethnicity</b>  | <b>No.</b> | <b>Ethnicity</b>  | <b>No.</b> |
|-------------------|------------|-------------------|------------|
| <b>FEMALE</b>     |            | <b>MALE</b>       |            |
| White British     | 99         | White British     | 103        |
| White Irish       | 13         | White Irish       | 12         |
| Indian            | 7          | Indian            | 5          |
| Chinese           | 5          | Chinese           | 5          |
| Black African     | 4          | Black African     | 4          |
| Arab              | 3          | Arab              | 3          |
| White Welsh       | 2          | Pakistani         | 3          |
| White             | 2          | White Welsh       | 2          |
| Japanese          | 2          | White Italian     | 2          |
| Pakistani         | 2          | White             | 1          |
| Asian             | 1          | Asian             | 1          |
| Sri Lankan        | 1          | Sri Lankan        | 1          |
| Bangladeshi       | 1          | Bangladeshi       | 1          |
| Black British     | 1          | Black British     | 1          |
| Chilean           | 1          | Greek Cypriot     | 1          |
| Greek Cypriot     | 1          | Jewish            | 1          |
| Iranian           | 1          | White S.african   | 1          |
| Jewish            | 1          | White Netherlands | 1          |
| Latino/S.American | 1          | White Lithuanian  | 1          |
| Vietnamese        | 1          | White NewZealand  | 1          |
| White Finnish     | 1          | White European    | 1          |
| White French      | 1          | White German      | 1          |
| White NewZealand  | 1          | White Scottish    | 1          |

|                       |     |                         |     |
|-----------------------|-----|-------------------------|-----|
| White Polish          | 1   | White Uruguay           | 1   |
| White Russian         | 1   | Mixed (Irish & Italian) | 1   |
| White Scottish        | 1   | Mixed (White & Black)   | 1   |
| White Serbian         | 1   |                         |     |
| White Uruguay         | 1   |                         |     |
| Mixed (White & Black) | 1   |                         |     |
| <b>Total</b>          | 158 | <b>Total</b>            | 156 |

**Ethnicities of all ICSI & IVF patients:****Female****Total 873**

| <b>Ethnicity</b>  | <b>No.</b> | <b>Ethnicity</b>        | <b>No.</b> |
|-------------------|------------|-------------------------|------------|
| Afghani           | 6          | White Columbian         | 3          |
| African American  | 1          | Mixed (Black and white) | 2          |
| Albanian          | 1          | Moroccan                | 1          |
| Algerian          | 1          | Other White             | 1          |
| Anglo-Indian      | 1          | Pakistani               | 20         |
| Arab              | 2          | Polish/Turkish          | 1          |
| Asian             | 31         | Portuguese              | 5          |
| Asian Mauritian   | 1          | White Romanian          | 6          |
| Asian Filipino    | 7          | White South African     | 10         |
| Sri Lankan        | 19         | Serbian                 | 1          |
| Indian            | 94         | Somalian                | 3          |
| Japanese          | 9          | Sudanese                | 1          |
| Asian/Oriental    | 1          | Tamil                   | 2          |
| Bangladeshi       | 7          | Turkish                 | 1          |
| Black African     | 93         | Vietnamese              | 3          |
| Black Caribbean   | 14         | West Indian             | 1          |
| Black British     | 22         | White                   | 1          |
| Black Mixed       | 1          | White/Asian             | 1          |
| Black Saotome     | 1          | German/Portuguese       | 1          |
| Black/West Indian | 1          | White Polish            | 12         |
| Brazilian         | 6          | White American          | 8          |
| Bulgarian         | 6          | White Australian        | 7          |
| Caribbean/Indian  | 1          | White Azerbaijan        | 1          |



|                          |    |                    |     |
|--------------------------|----|--------------------|-----|
| Chinese                  | 20 | White British      | 297 |
| Croatian                 | 1  | White Hungarian    | 1   |
| European/Asian           | 1  | White Italian      | 11  |
| White French             | 11 | White European     | 9   |
| Greek                    | 5  | White German       | 7   |
| Greek/Irish              | 1  | White Irish        | 23  |
| Hispanic                 | 3  | White Latvian      | 1   |
| White British/Australian | 1  | White Lithuanian   | 6   |
| Iranian                  | 4  | White Moldovan     | 2   |
| Iraqi                    | 2  | White Netherlands  | 1   |
| Jewish                   | 1  | White New Zealand  | 4   |
| Korean                   | 1  | White Norwegian    | 2   |
| Kuwaiti                  | 1  | White Russian      | 1   |
| Kyrgyz                   | 1  | White Serbian      | 1   |
| Latin American           | 3  | White Slovakian    | 2   |
| Chilean                  | 1  | White Spanish      | 7   |
| White Canadian           | 3  | White Ukrainian    | 4   |
| Malaysian                | 2  | White Uzbekistani  | 1   |
| Mauritian                | 2  | White/Indian       | 1   |
| Middle Eastern           | 2  | White Scandinavian | 1   |
| Mixed                    | 4  | White Czech        | 1   |
| White Dutch              | 1  | White Estonia      | 1   |

## Appendix B

### Ethnicities of all ICSI & IVF patients:

#### Male

**Total 870**

| <b>Ethnicity</b> | <b>No.</b> | <b>Ethnicity</b>        | <b>No.</b> |
|------------------|------------|-------------------------|------------|
| Afghani          | 5          | Mixed (Black and white) | 1          |
| Anglosaxon       | 1          | Moroccan                | 1          |
| Albanian         | 2          | Other White             | 3          |
| Algerian         | 4          | Pakistani               | 22         |
| Armenian         | 1          | Egyptian                | 1          |
| Arab             | 1          | Portuguese              | 7          |
| Asian            | 27         | White Romanian          | 4          |
| Asian Mauritian  | 1          | White South African     | 12         |
| Asian Filipino   | 7          | Serbian                 | 1          |
| Sri Lankan       | 19         | Somalian                | 3          |
| Indian           | 88         | Sudanese                | 1          |
| Japanese         | 2          | Tamil                   | 2          |
| Asian/Oriental   | 1          | Turkish                 | 2          |
| Bangladeshi      | 8          | Vietnamese              | 2          |
| Black African    | 87         | West Indian             | 1          |
| Black Caribbean  | 15         | White                   | 3          |
| Black Jamaican   | 2          | Nepalese                | 1          |
| Black other      | 1          | White Scottish          | 2          |
| Black British    | 16         | White/Asian             | 2          |
| Armenian         | 1          | White Polish            | 12         |
| Black Saotome    | 1          | White American          | 8          |
| Brazilian        | 2          | White Australian        | 4          |

|                   |    |                     |     |
|-------------------|----|---------------------|-----|
| Bulgarian         | 6  | White Swedish       | 1   |
| Indian/Portuguese | 1  | White British       | 346 |
| Chinese           | 12 | White Italian       | 12  |
| Croatian          | 1  | White European      | 11  |
| White French      | 5  | White German        | 5   |
| Greek             | 3  | White Irish         | 30  |
| Palestinian       | 1  | White Mediterranean | 1   |
| Hispanic          | 1  | White Lithuanian    | 3   |
| Kazakh            | 1  | White Moldovan      | 1   |
| Iranian           | 4  | White Netherlands   | 4   |
| Iraqi             | 2  | White New Zealand   | 6   |
| Jewish            | 1  | White Russian       | 2   |
| Latino            | 1  | White Welsh         | 2   |
| Kuwaiti           | 1  | White Slovakian     | 3   |
| Latin American    | 1  | White Spanish       | 1   |
| White Canadian    | 3  | White Ukrainian     | 3   |
| Malaysian         | 1  | White Estonia       | 1   |
| Mauritian         | 1  |                     |     |
| Middle Eastern    | 2  |                     |     |
| Mixed             | 4  |                     |     |
